# Supplementary material for: Estimating the population size of men who have sex with men: a modified Laska, Meisner and Siegel procedure taking into account internet populations
Source: HighWire-hosted journal article supplement (doi:10.1136/sextrans-2012-050531), 2012-09-01
Supplement: sextrans-2012-050531supp.xls [file sextrans-2012-050531supp.xls]

## Sheet: Sheet1
i weeks before the survey week	mi Physical venues						mi Virtual venues
	Bathroom 1	Bathroom 2	Bathroom 3	Music bar	Totals		QQ group	Website	Totals
1	44	51	32	73	200		853	399	1252
2	29	11	11	34	85		776	287	1063
3	14	8	9	15	46		91	250	341
4	17	7	21	13	58		45	87	132
5	5	2	5	4	16		26	66	92
6	3	3	5	3	14		24	32	56
7	6	0	3	3	12		8	45	53
8	13	0	8	0	21		15	15	30
9	1	2	5	3	11		3	22	25
10	4	0	3	1	8		3	28	31
11	1	0	1	0	2		2	6	8
12	4	3	0	1	8		1	10	11
13	1	0	1	1	3		3	9	12
14	0	0	0	0	0		1	2	3
15	3	1	1	0	5		1	2	3
16	3	0	1	0	4		1	1	2
17	2	1	1	1	5		0	0	0
18	1	0	4	1	6		0	0	0
19	0	0	1	1	2		0	1	1
20	3	0	0	0	3		0	2	2
22	1	0	1	0	2		0	0	0
23	1	0	1	0	2		0	0	0
24	5	0	0	1	6		0	0	0
25	0	0	0	0	0		0	1	1
26	0	0	1	1	2		2	0	2
28	2	1	1	0	4		0	0	0
30	0	1	2	0	3		0	0	0
31	1	0	0	2	3		0	0	0
32	3	0	1	2	6		0	0	0
33	0	0	0	0	0		0	1	1
34	0	0	0	0	0		0	1	1
36	1	0	0	0	1		0	0	0
37	0	0	0	1	1		0	0	0
38	0	0	1	1	2		0	0	0
39	1	1	2	1	5		0	0	0
40	2	0	0	0	2		1	1	2
46	0	0	0	0	0		0	1	1
48	1	0	0	0	1		0	0	0
49	1	0	0	0	1		0	0	0
50	0	0	0	0	0		0	1	1
52	6	2	4	4	16		0	0	0
Totals	179	94	126	167	566		1856	1270	3126
